# Supplementary material for: Involvement of AF1q/MLLT11 in the progression of ovarian cancer
Source: PubMed Central journal article supplement (PMC5410301; doi:10.18632/oncotarget.15574), 2017-02-21
Supplement: oncotarget-08-23246-s001.pdf [file oncotarget-08-23246-s001.pdf]

# Involvement of AF1q/MLLT11 in the progression of ovarian cancer

## Supplementary Materials

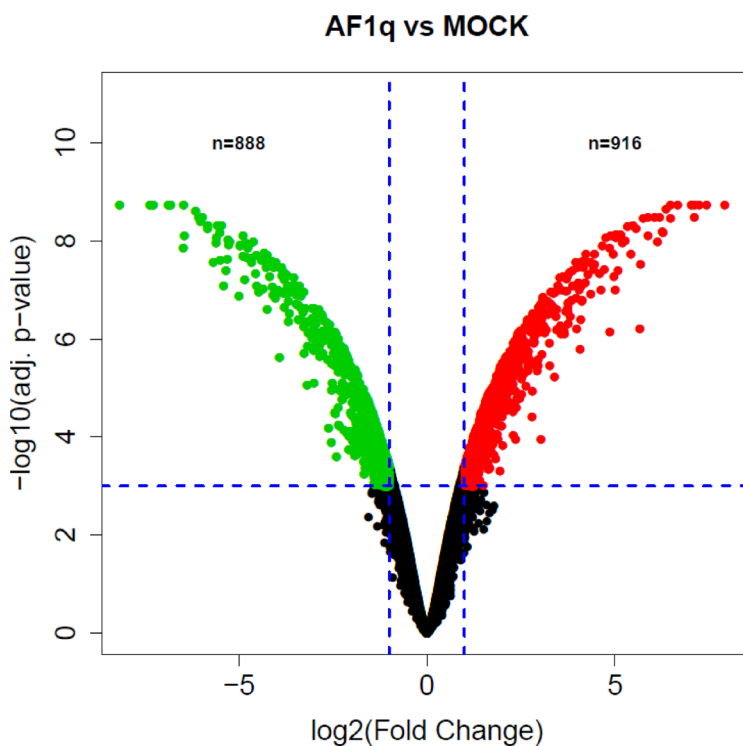

**Supplementary Figure 1: Volcano plot summarizing differential analysis results in A2780 cells overexpressing AF1q compared to mock cells.** For each gene, log<sub>2</sub> fold change is plotted on the x-axis and the negative log<sub>10</sub> *t*-test *p*-value on the y-axis. Statistical significance threshold (adj *p* < 0.001) is indicated by the horizontal line.

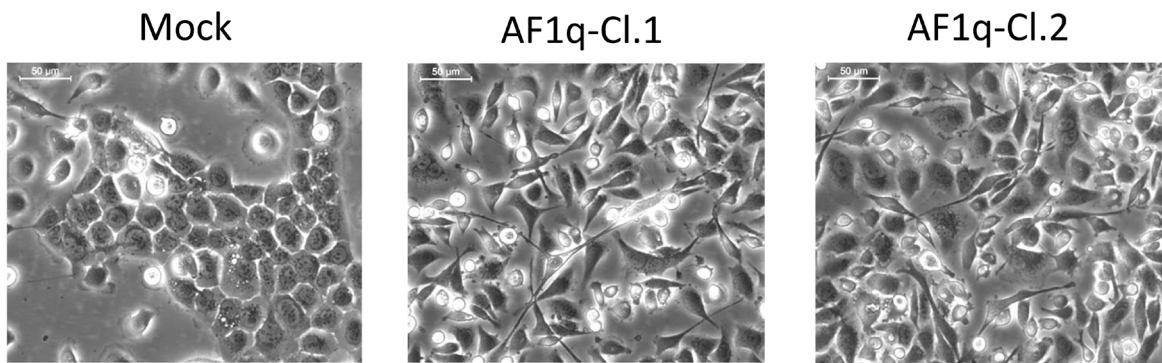

**Supplementary Figure 2: AF1q overexpression induces a spindle-shape phenotype in OVCAR-5 ovarian cancer cells.** Morphological appearances of mock and AF1q overexpressing OVCAR-5 clones (Cl.1 and Cl.2).

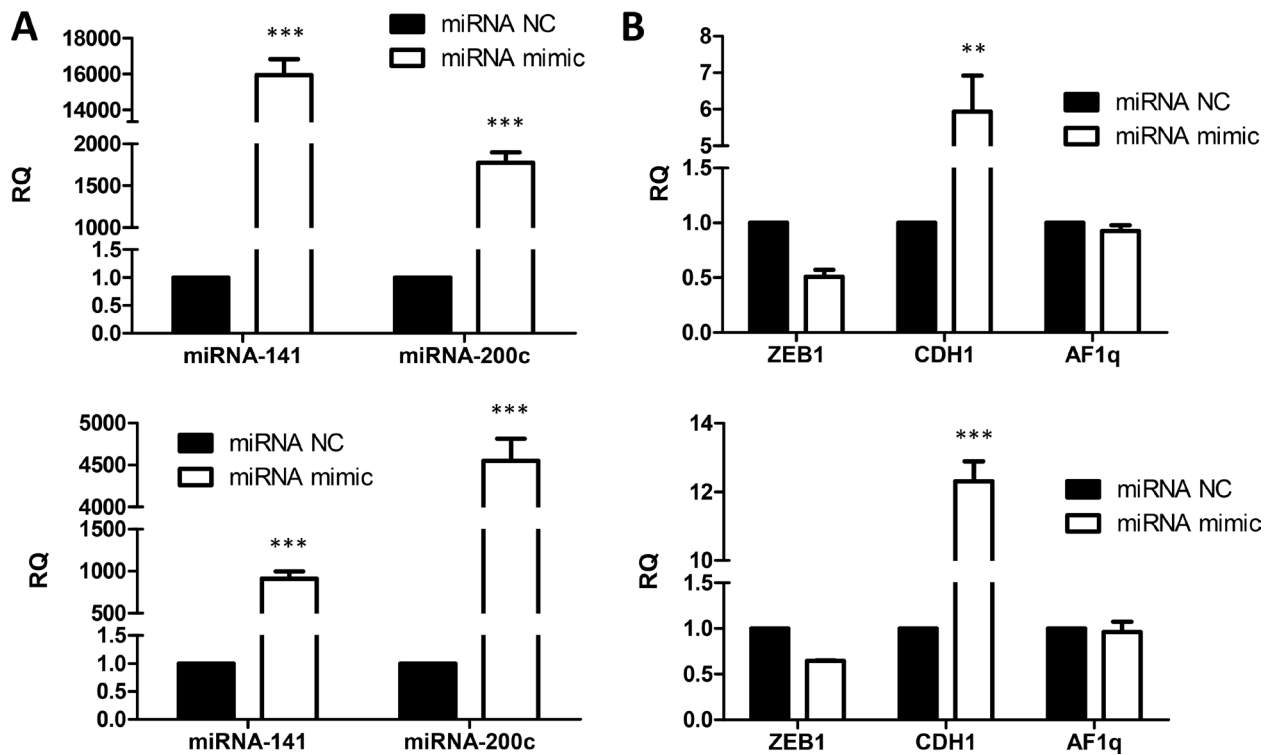

**Supplementary Figure 3: Induction of MET by miR-200 family transfection does not affect AF1q expression.** (A) Real-Time PCR analyses showing miR-141 and miR-200c expression levels 72 h after transfection in TOV-21G (upper panel) and A2780 (lower panel) cell lines compared to miRNA non coding (NC) transfected cells. (B) Real-Time PCR analyses of Zeb1, Cdh1 and AF1q in TOV-21G (upper panel) and A2780 (lower panel) miRNA transfected cell lines compared to miRNA non coding (NC) transfected cells. Asterisk indicate *p*-value: \*\* from 0.001 to 0.01 and \*\*\* < 0.001

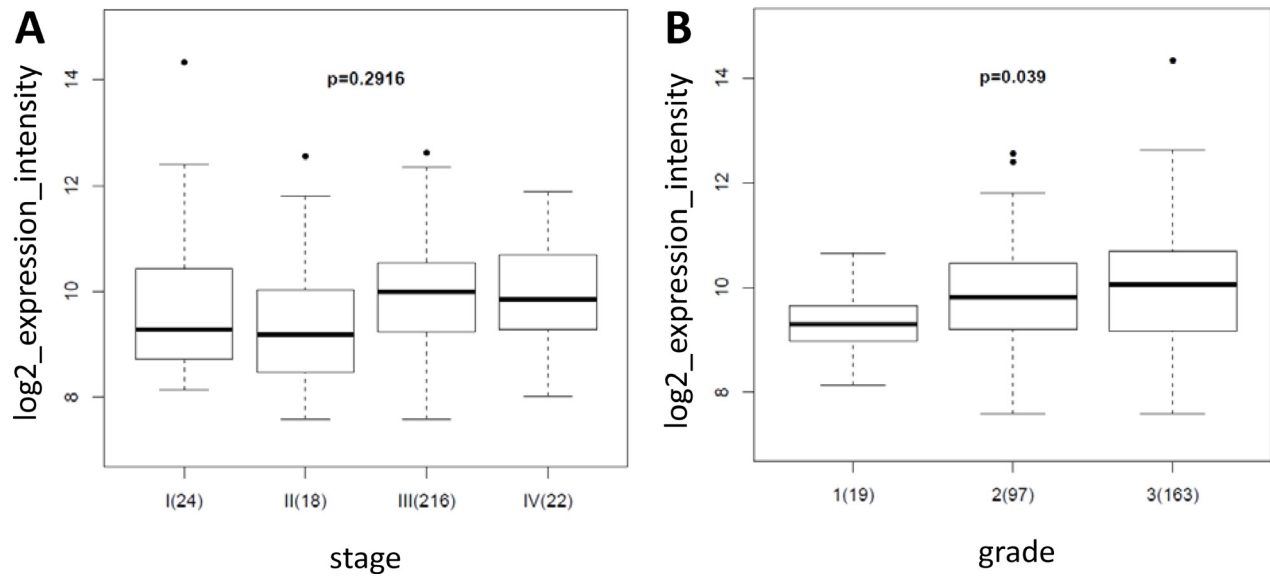

**Supplementary Figure 4: Correlation of AF1q expression with tumor stage and grade in the Tothill dataset.** Boxplots showing AF1q mRNA expression according to (A) tumor stage ( $p = 0.292$ ) and (B) grade ( $p = 0.031$ ). Numbers in brackets indicate the number of analyzed cases in each group.

**Supplementary Table 1: Top 25 up and down-regulated genes in A2780 cells overexpressing AF1q (C1.9) compared to mock cells**

| Up-regulated genes | Fold-change | Adjusted $p$ -value | Down-regulated genes | Fold-change | Adjusted $p$ -value |
|--------------------|-------------|---------------------|----------------------|-------------|---------------------|
| AKR1C3             | 241,9       | 1,86E-09            | MDK                  | 0,003       | 1,86E-09            |
| S100A4             | 174,0       | 1,86E-09            | SPP1                 | 0,006       | 1,86E-09            |
| TMSL3              | 151,2       | 1,86E-09            | CBR3                 | 0,006       | 1,86E-09            |
| AKR1C2             | 139,5       | 1,86E-09            | CYBA                 | 0,009       | 1,86E-09            |
| DKK1               | 138,8       | 3,24E-09            | LOC731042            | 0,009       | 1,86E-09            |
| PI15               | 131,1       | 1,86E-09            | PCDH19               | 0,011       | 1,36E-08            |
| AKR1C4             | 101,6       | 1,86E-09            | LIN28                | 0,011       | 1,86E-09            |
| TMEM166            | 89,18       | 1,86E-09            | POU4F1               | 0,011       | 7,91E-09            |
| NFIB               | 82,22       | 2,23E-09            | SPAG6                | 0,014       | 2,52E-09            |
| CH25H              | 77,57       | 6,70E-09            | DIRAS3               | 0,015       | 3,24E-09            |
| MGP                | 76,63       | 6,30E-09            | DLK1                 | 0,015       | 3,24E-09            |
| MMP3               | 73,05       | 3,24E-09            | GPM6B                | 0,015       | 3,94E-09            |
| ACTG2              | 70,24       | 1,04E-08            | HS.19193             | 0,016       | 3,24E-09            |
| MARCKS             | 66,36       | 3,24E-09            | TFAP2A               | 0,018       | 4,76E-09            |
| PRPH               | 58,88       | 7,97E-09            | TFPI                 | 0,018       | 5,53E-09            |
| LOC100129681       | 58,87       | 3,24E-09            | RFTN2                | 0,018       | 4,76E-09            |
| TNFSF10            | 53,92       | 3,38E-09            | RSPO3                | 0,020       | 2,75E-08            |
| TSPAN8             | 51,32       | 2,96E-08            | C3ORF70              | 0,020       | 1,08E-08            |
| CRYAB              | 50,51       | 6,05E-07            | ZIC2                 | 0,021       | 8,53E-09            |
| ISL1               | 47,14       | 5,68E-09            | FAM5C                | 0,021       | 4,76E-09            |
| SOX18              | 44,64       | 4,76E-09            | RBM47                | 0,022       | 6,70E-09            |
| SLC44A1            | 43,08       | 1,88E-08            | CHRNA9               | 0,022       | 2,51E-08            |
| BST2               | 40,26       | 5,12E-09            | C19ORF30             | 0,023       | 4,90E-09            |
| CD36               | 38,61       | 9,93E-09            | VCAN                 | 0,024       | 8,09E-08            |
| MMP10              | 36,69       | 1,11E-08            | SEMA6A               | 0,025       | 4,08E-08            |

**Supplementary Table 2: Summary of the enriched gene sets with FDR < 0.25 obtained through the GSEA analysis**

| Positively enriched Gene sets |                                            | Size | NES   | FDR <i>q</i> -val |
|-------------------------------|--------------------------------------------|------|-------|-------------------|
| 1                             | HALLMARK_MYOGENESIS                        | 118  | 2.14  | 0.000             |
| 2                             | HALLMARK_EPITHELIAL_MESENCHYMAL_TRANSITION | 139  | 1.94  | 0.001             |
| 3                             | HALLMARK_KRAS_SIGNALING_UP                 | 109  | 1.83  | 0.002             |
| 4                             | HALLMARK_WNT_BETA_CATENIN_SIGNALING        | 33   | 1.80  | 0.002             |
| 5                             | HALLMARK_COAGULATION                       | 78   | 1.79  | 0.002             |
| 6                             | HALLMARK_P53_PATHWAY                       | 169  | 1.73  | 0.006             |
| 7                             | HALLMARK_ESTROGEN_RESPONSE_EARLY           | 133  | 1.72  | 0.006             |
| 8                             | HALLMARK_ESTROGEN_RESPONSE_LATE            | 138  | 1.61  | 0.021             |
| 9                             | HALLMARK_HYPOXIA                           | 158  | 1.59  | 0.025             |
| Negatively enriched Gene sets |                                            | Size | NES   | FDR <i>q</i> -val |
| 1                             | HALLMARK_APICAL_SURFACE                    | 22   | -1.66 | 0.046             |

**Size** indicates the number of genes included in the gene set;

**NES** indicates the normalized enrichment score (enrichment score for the gene set after normalization across analyzed gene sets);

**FDR *q*-val** indicates the false discovery rate.

**Supplementary Table 3: Univariable and multivariable cox regression analysis in malignant serous samples from the Tothill dataset**

| Variable                    | RFS  |          | OS   |          |
|-----------------------------|------|----------|------|----------|
|                             | HR   | <i>P</i> | HR   | <i>P</i> |
| AF1q (Univariable)          | 0.96 | 0.635    | 0.96 | 0.635    |
| Debulking (Univariable)     | 1.79 | 0.007    | 1.47 | 0.074    |
| Multivariable analysis AF1q | 0.92 | 0.414    | 0.95 | 0.564    |
| Debulking (> 1 vs ≤ 1)      | 1.81 | 0.006    | 1.48 | 0.069    |
